# Supplementary material
Source: PubMed Central journal article supplement (PMC5493476)

# Figure S2

**a**

308 genes commonly over expressed in MCF7 and MDA-MB-231 after co-culture with activated PBMCs

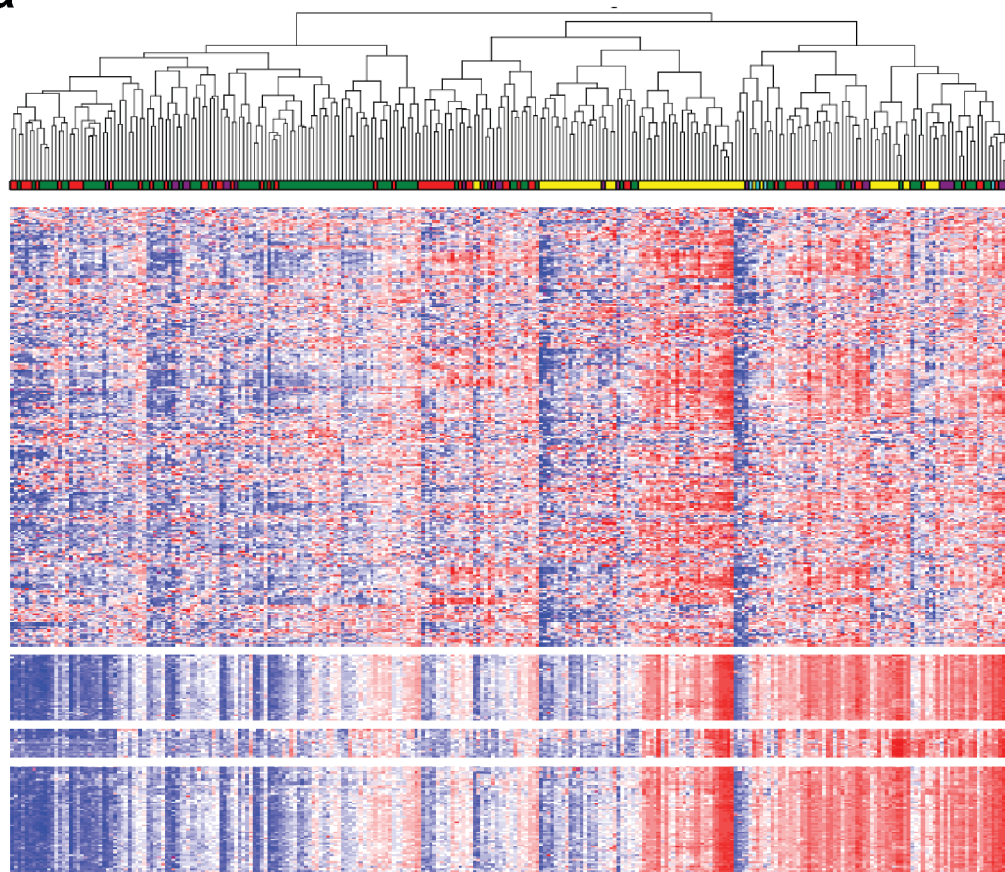

- Basal like
- Her2 enriched
- LumA
- LumB
- Normal like

**b**

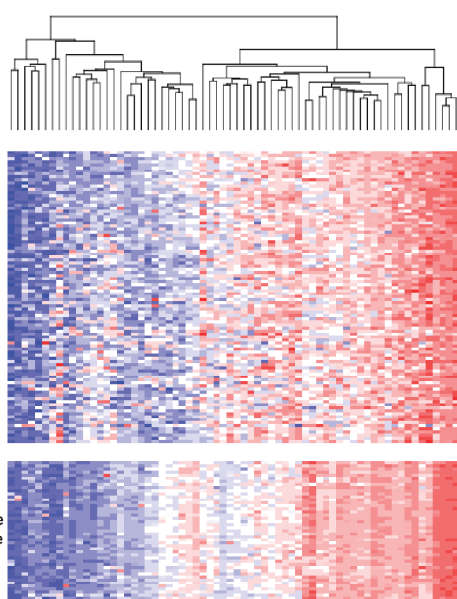

**Top 20 genes**

- CD7
- CXCL9
- APOBEC3G
- GBP5
- GBP4
- AIM2
- CIITA
- IL18BP
- IDO1**
- SELL
- FAM26F
- PDCD1LG2
- CXCL11
- CD74
- PSMB9
- GBP1
- IRF1
- PATL2
- CXCL10
- SOCS1

**c**

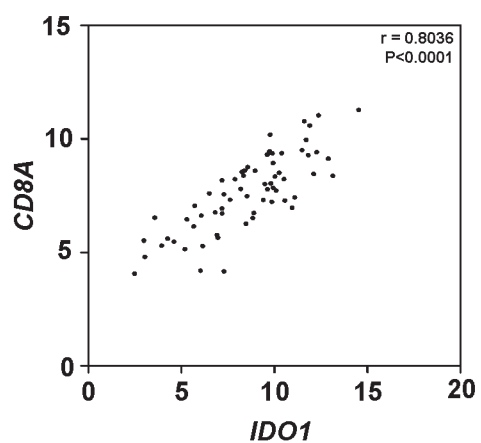

Supplement: NIHMS857868-supplement-3.pdf [file NIHMS857868-supplement-3.pdf]
