# Supplementary material
Source: PubMed Central journal article supplement (PMC5493476)

# Figure S3

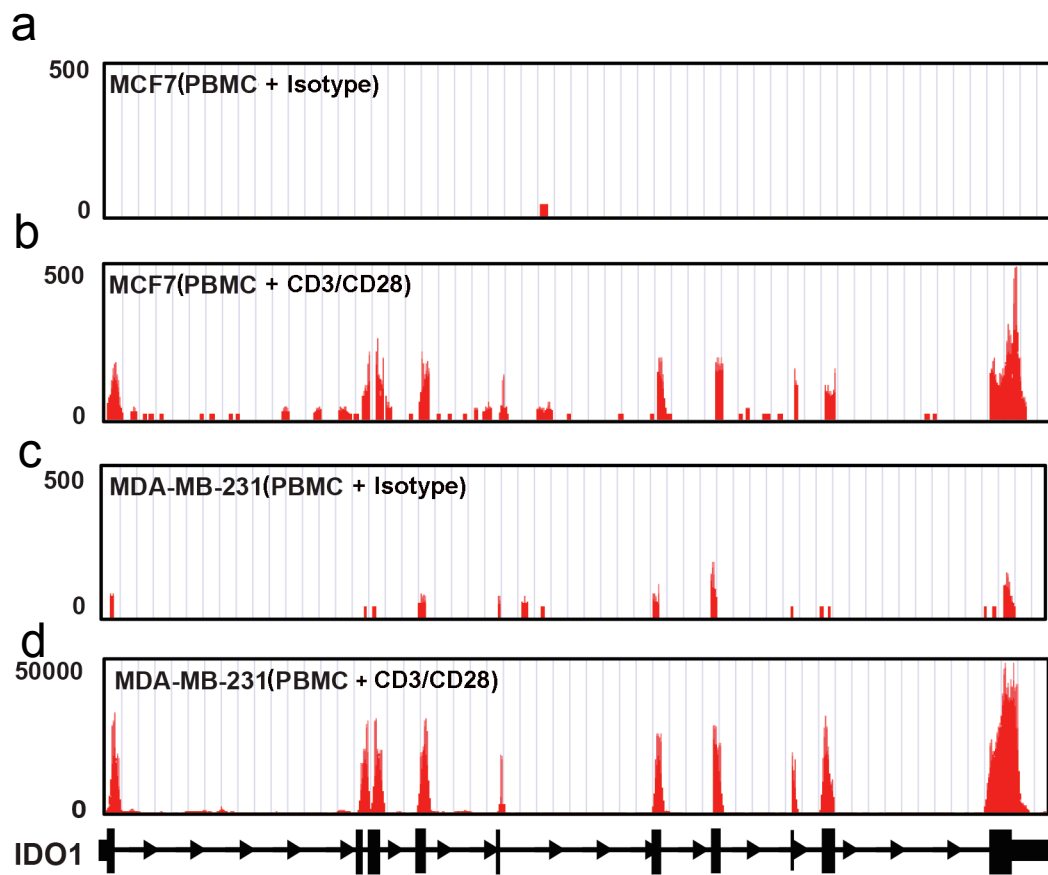

Supplement: NIHMS857868-supplement-4.pdf [file NIHMS857868-supplement-4.pdf]

**Figure S4**

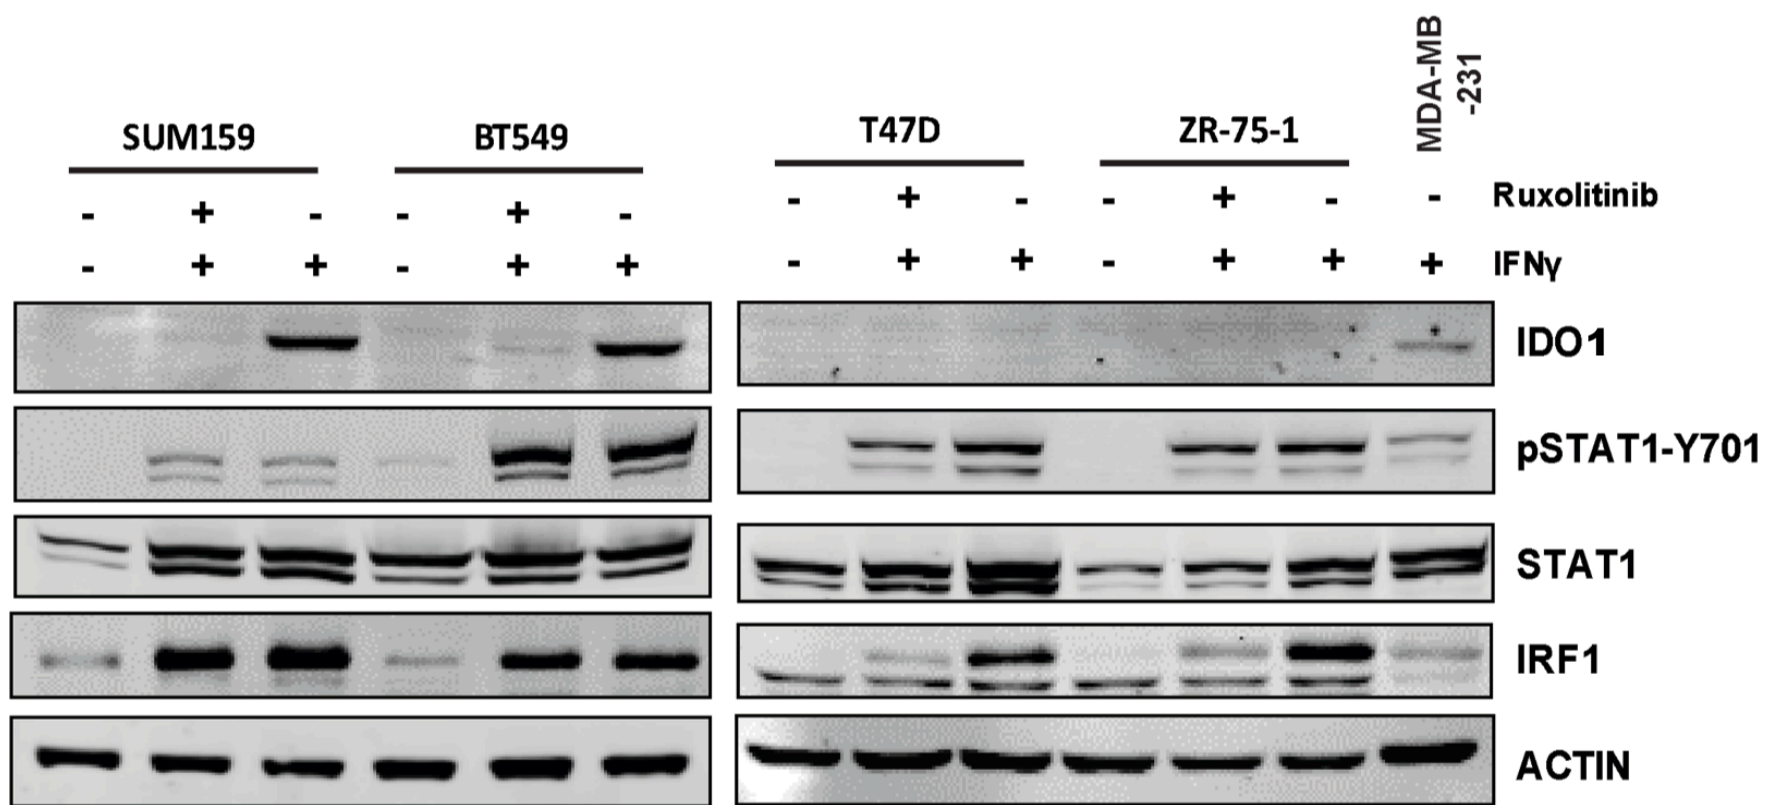

Supplement: NIHMS857868-supplement-5.pdf [file NIHMS857868-supplement-5.pdf]

Figure S6

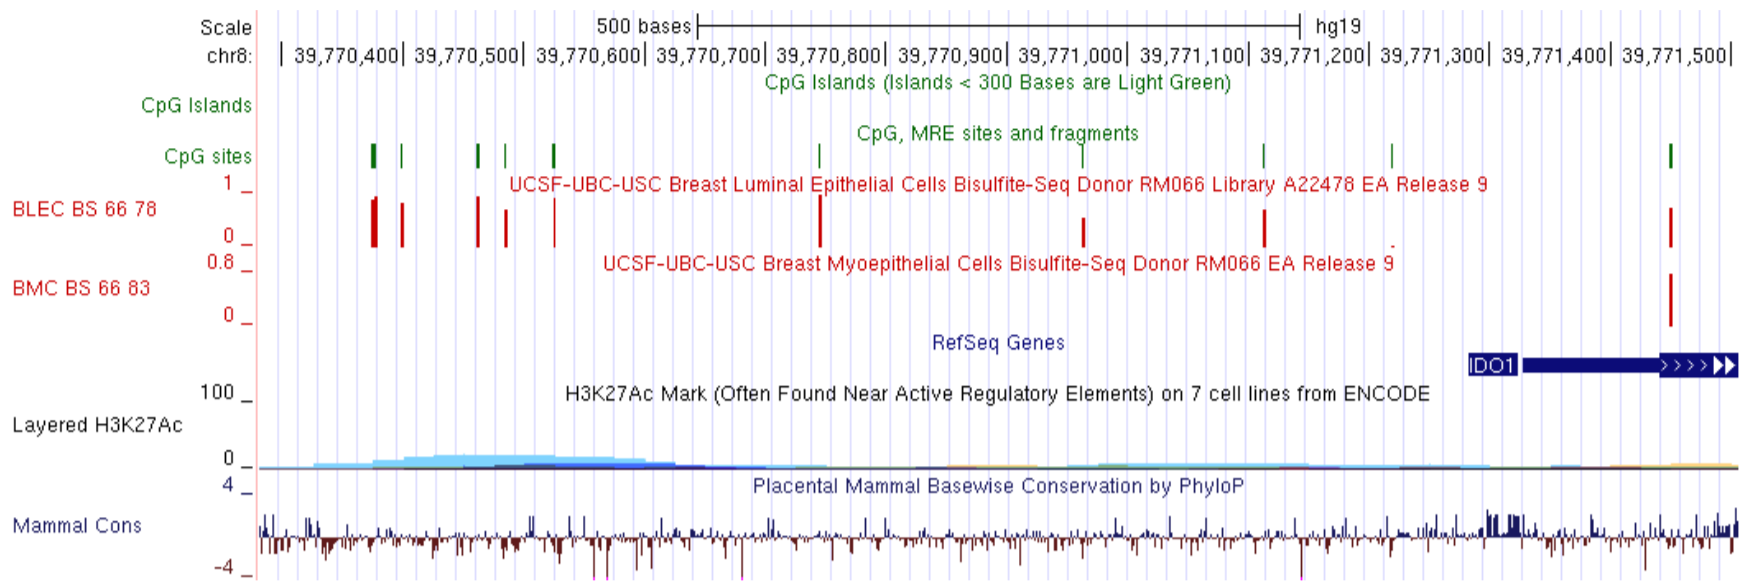

Supplement: NIHMS857868-supplement-7.pdf [file NIHMS857868-supplement-7.pdf]
